# Supplementary material for: Innovative solvent-free compound-direct synthesis of defect-rich ultra-thin NiS nanosheets for high-performance supercapacitors
Source: Royal Society of Chemistry journal article supplement (doi:10.1039/d3nr04903e), 2023-12-15
Supplement: d3nr04903e1.pdf [file d3nr04903e1.pdf]

## Innovatively Solvent-Free Compound-Direct Synthesis of Defect-Rich Ultra-Thin NiS Nanosheets for High-Performance Supercapacitors

Wutao Wei,<sup>a</sup> Zijie Guo,<sup>a</sup> Xuyan Qin<sup>a</sup> and Liwei Mi<sup>a,b,\*</sup>

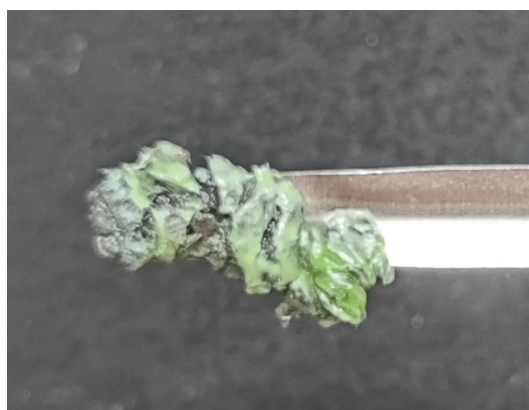

**Figure S1** The photo of the as-obtained paste mixture.

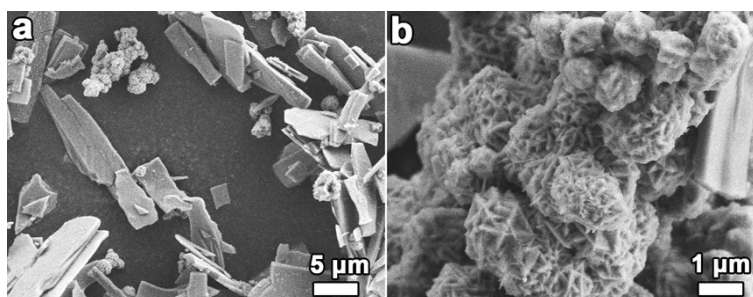

**Figure S2** SEM images of NiS prepared by similar strategy without the addition of NaCl.

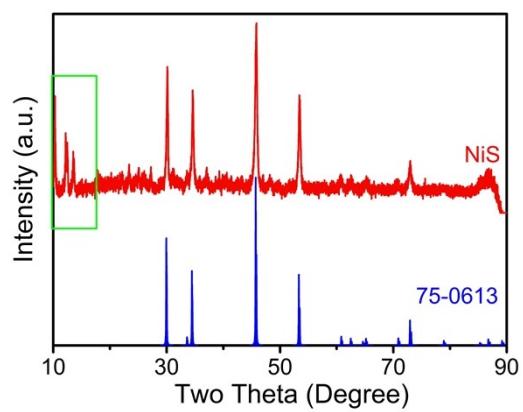

**Figure S3** XRD curve of NiS prepared by similar strategy without the addition of NaCl.

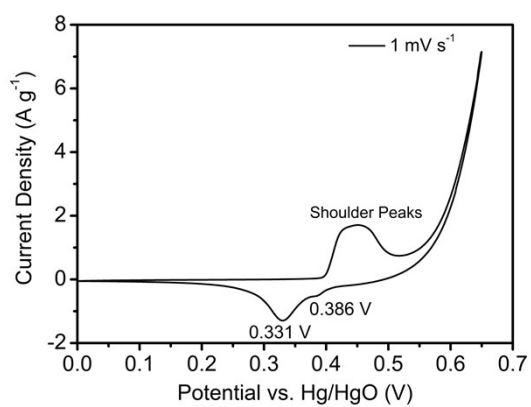

**Figure S4** CV curves of N-NiS at  $1 \text{ mV s}^{-1}$  in the three-electrode system.

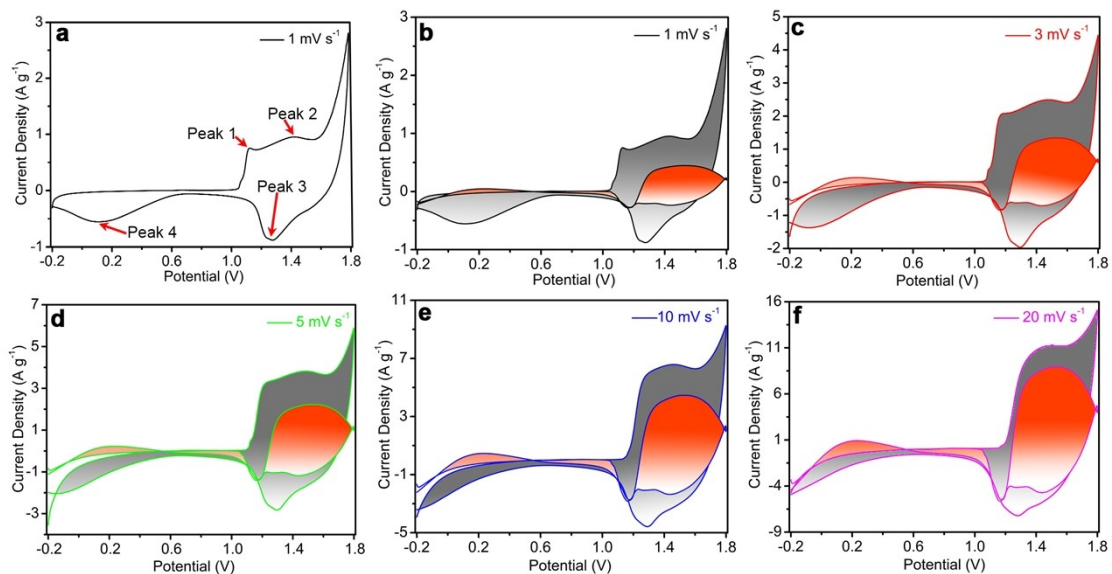

**Figure S5** (a) CV curve of N-NiS//AC device at the scan rate of  $1 \text{ mV s}^{-1}$ . (b-f) Total current response and capacitance contribution at different scan rates of N-NiS electrode.

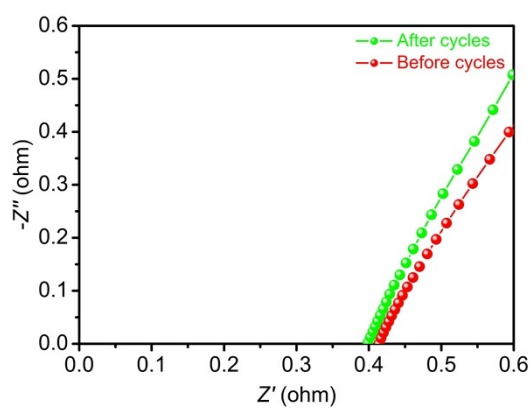

**Figure S6** Nyquist plots of N-NiS//AC before and after cycles.
